# Supplementary material for: STIM Protein-NMDA2 Receptor Interaction Decreases NMDA-Dependent Calcium Levels in Cortical Neurons
Source: MDPI journal article supplement (doi:10.3390/cells9010160), 2020-01-09
Supplement: s1 [file s1]

## Electronic Supplementary Material

### STIM protein-NMDA2 receptor interaction decreases NMDA-dependent calcium levels in cortical neurons

Joanna Gruszczyńska-Biegala<sup>1,2,\*</sup>, Klaudia Strucińska<sup>1</sup>, Filip Maciag<sup>1</sup>, Lukasz Majewski<sup>1</sup>, Maria Sładowska<sup>1,a</sup>, Jacek Kuznicki<sup>1</sup>

<sup>1</sup>International Institute of Molecular and Cell Biology, Laboratory of Neurodegeneration, Warsaw, Poland

<sup>2</sup>Mossakowski Medical Research Centre Polish Academy of Sciences, Molecular Biology Unit, Warsaw, Poland

<sup>a</sup> present address: The Centre of New Technologies, Laboratory of Mitochondrial Biogenesis, Warsaw, Poland

\* corresponding author: [jgruszczyńska@imdik.pan.pl](mailto:jgruszczyńska@imdik.pan.pl) Orcid: 0000-0003-3541-2550

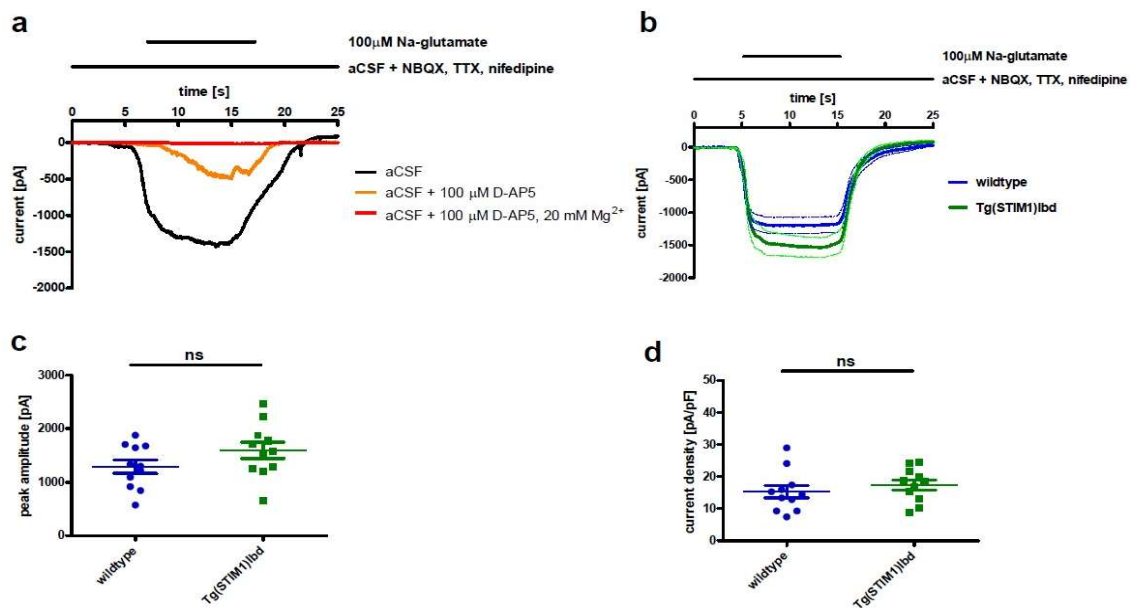

**Figure S1.** *In vitro* quantification of NMDA-induced currents with STIM overexpression. Electrophysiological recordings of NMDA-induced currents recorded from layer V pyramidal neurons from acute brain slices isolated from wild type and *Tg(Stim1)Ibd* mice.  $n_{\text{wild-type}} = n_{\text{Tg(Stim1)Ibd}} = 11$ . (a) Inhibiting evoked currents by D-AP5 and  $\text{Mg}^{2+}$  ions (traces from single experiment, all stimulations performed on the same cell). (b) Averaged traces of responses obtained from neurons of the two genetic variants; dotted lines represent standard deviation of the mean. (c) Comparison of peak amplitude of NMDAR-mediated currents; ns – not significant ( $p < 0.05$ ). (d) Comparison of current density of NMDAR-mediated currents ( $p < 0.05$ ).

**Table S1.** Interaction between STIMs and NR2 subunits of the NMDA receptor. Arrows indicate statistically significant change (increase or decrease), NC - no statistically significant change.

| Interacting proteins | PLA<br>TG/EGTA vs $\text{Ca}^{2+}$ | Immunofluorescence<br>TG/EGTA vs $\text{Ca}^{2+}$ | Co-IP<br>TG/EGTA vs $\text{Ca}^{2+}$ |
|----------------------|------------------------------------|---------------------------------------------------|--------------------------------------|
| STIM1 with NR2A      | NC                                 | ↑                                                 | ↑ or NC                              |
| STIM1 with NR2B      | ↓                                  | ↓                                                 | ↓                                    |
| STIM2 with NR2A      | ↓                                  | ↓                                                 | ↓                                    |
| STIM2 with NR2B      | ↑                                  | NC                                                | NC                                   |
